# Supplementary material
Source: Royal Society of Chemistry journal article supplement (doi:10.1039/d5nr05211d)
Supplement: d5nr05211d3.pdf [file d5nr05211d3.pdf]

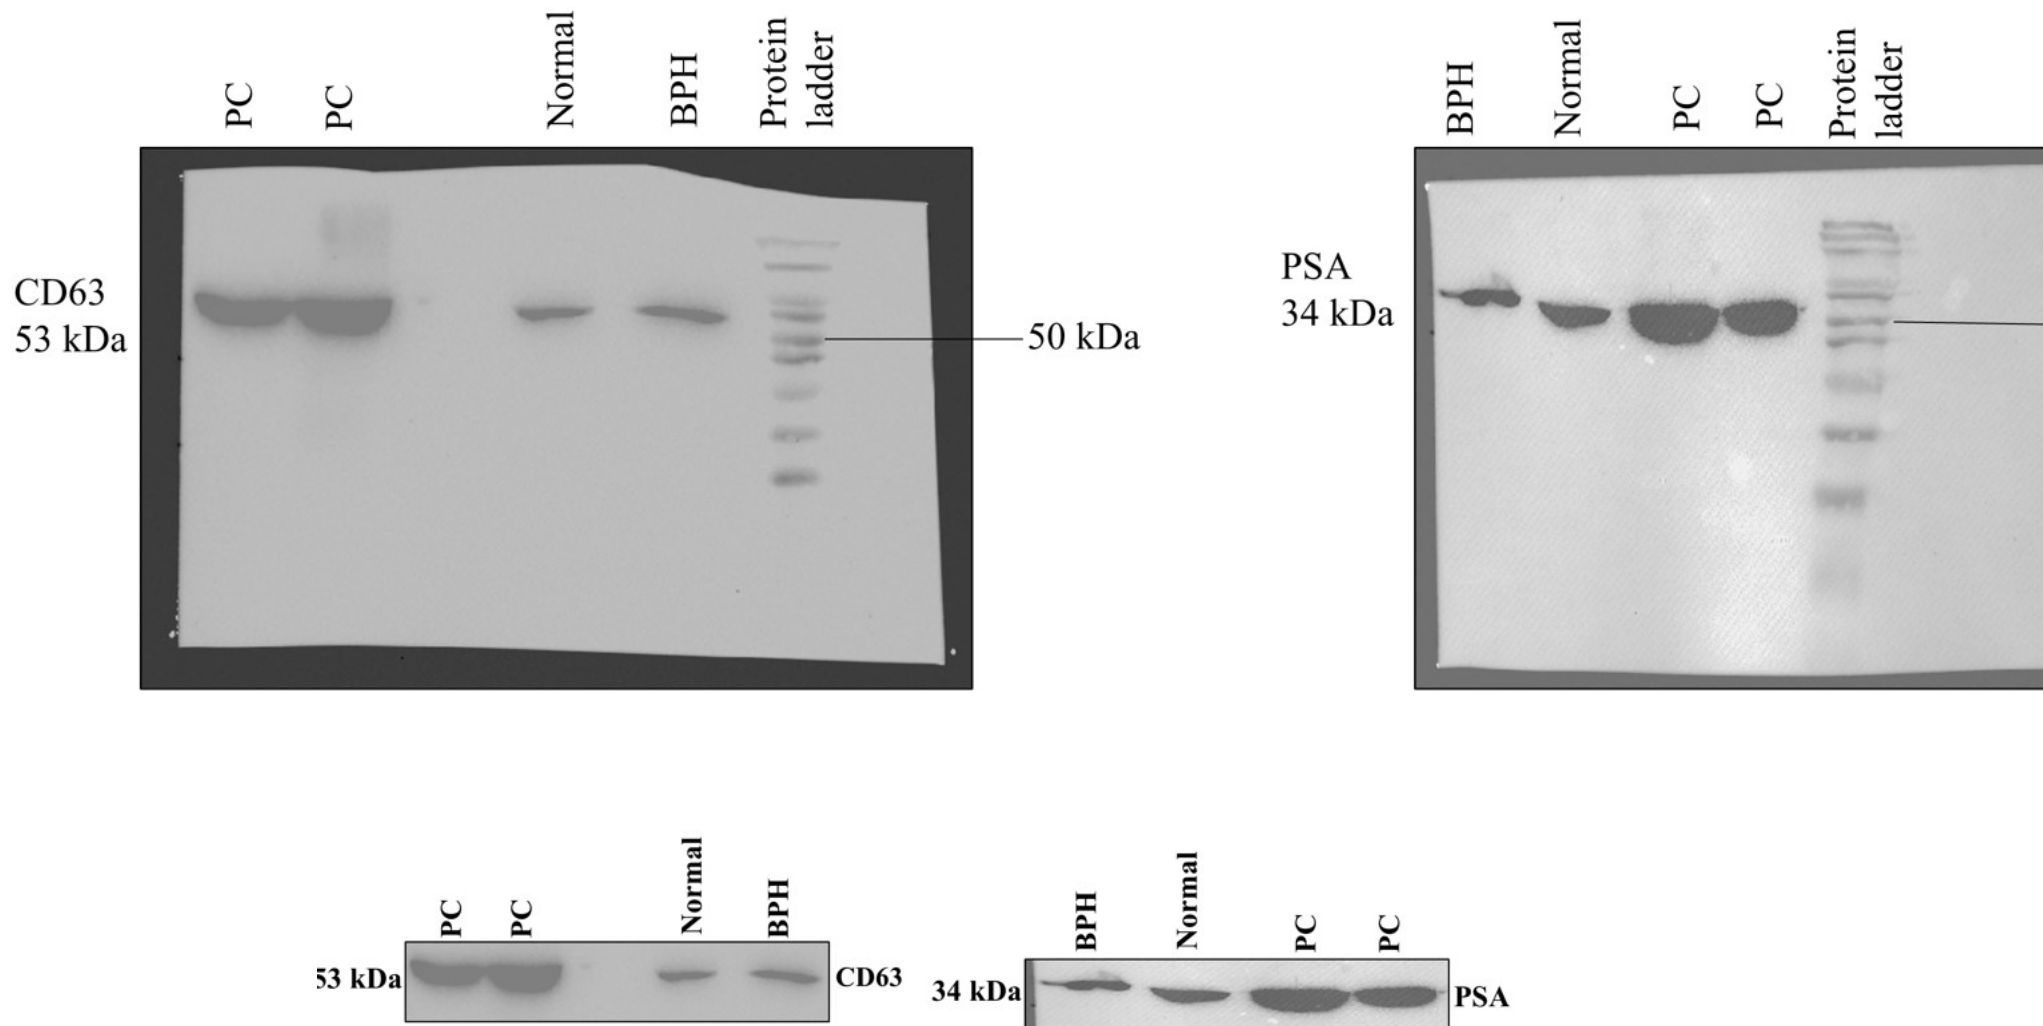

Figure 4g Western blot analysis showing the expression of exosomal markers CD63 and prostate-specific antigen (PSA) in exosomes isolated from representative Normal, BPH, and PC plasma samples
