# Supplementary material
Source: Royal Society of Chemistry journal article supplement (doi:10.1039/d5nr05211d)

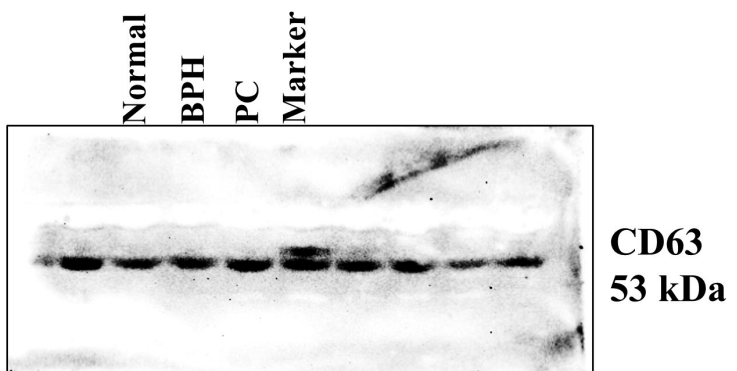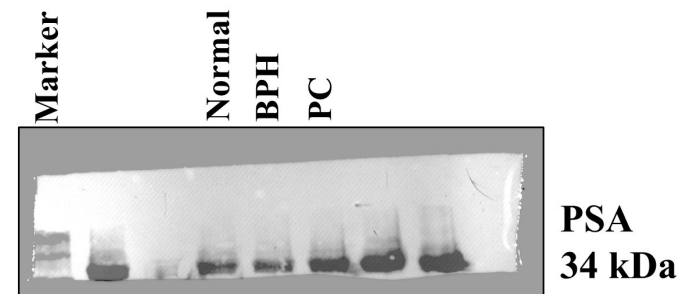

The pre-stained protein ladder (marker) used was of Abcam (10-245 kDa), cat no. ab116028

Supplement: d5nr05211d1.pdf [file d5nr05211d1.pdf]
